# Supplementary material
Source: PubMed Central journal article supplement (PMC10427949)
Supplement: jama-e2313140-s002.pdf [file jama-e2313140-s002.pdf]

1

2

## **-SAM Study**

3

4

Evaluation of two vaginal uterus sparing surgical methods for pelvic organ reconstruction: the modified Manchester operation (MM) and sacrospinous hysteropexy (SSH)

5

6

7

8

### *Statistical Analysis Plan*

9

|                                          |                                                     |
|------------------------------------------|-----------------------------------------------------|
| <b>EUDRA CT no.</b>                      | NTR 6978                                            |
| <b>Dutch Clinical trial registry no.</b> |                                                     |
| <b>Principal investigator, centre</b>    | Dr. Kirsten B. Kluivers, Radboudumc                 |
| <b>Coordinating investigator</b>         | Drs. Roosje A. Enklaar en drs. Sascha F.M. Schulten |
| <b>Sponsor</b>                           | Radboudumc                                          |
| <b>SAP version, date</b>                 | Version 1, 19-09-2022                               |
| <b>Trial methodologist</b>               | Martine C. Van der Weide                            |
| <b>SAP author</b>                        | Roosje Enklaar en Sascha Schulten                   |

10

11

12 **Names and signatures**

| Role of contributor                                         | Name and full affiliation                                                                                                                                                                               | Signature                                                                                                                                                                 | Date of signature |
|-------------------------------------------------------------|---------------------------------------------------------------------------------------------------------------------------------------------------------------------------------------------------------|---------------------------------------------------------------------------------------------------------------------------------------------------------------------------|-------------------|
| <b>Principal investigator</b>                               | Dr. Kirsten B. Kluivers,<br>Department of Obstetrics<br>and Gynaecology, Radboud<br>university medical center,<br>Geert Grooteplein Zuid 10,<br>6525 GA, Nijmegen, The<br>Netherlands                   | <br>Kirsten Kluivers                                                                    | 19-9-2022         |
| <b>Researcher who will perform the statistical analysis</b> | Roosje Enklaar and<br>Sascha Schulten<br>Department of Obstetrics<br>and Gynaecology, Radboud<br>university medical center,<br>Geert Grooteplein Zuid 10,<br>6525 GA, Nijmegen, The<br>Netherlands      | <br> | 19-9-2022         |
| <b>Methodologist/statistician consulted</b>                 | Martine C. vd Weide<br>Department of Obstetrics<br>and Gynaecology,<br>Amsterdam University<br>Medical Centre, University<br>of Amsterdam,<br>Meibergdreef 9, 1105 AZ,<br>Amsterdam, The<br>Netherlands |                                                                                                                                                                           | 19-9-2022         |
| <b>Contributor to statistical analysis plan</b>             |                                                                                                                                                                                                         |                                                                                                                                                                           |                   |
| ...                                                         |                                                                                                                                                                                                         |                                                                                                                                                                           |                   |

13

14

## Names and signatures

| Role of contributor                                     | Name and full affiliation                                                                                                                                                                                    | Signature                                                                                                                                                                   | Date of signature |
|---------------------------------------------------------|--------------------------------------------------------------------------------------------------------------------------------------------------------------------------------------------------------------|-----------------------------------------------------------------------------------------------------------------------------------------------------------------------------|-------------------|
| Principal investigator                                  | Dr. Kirsten B. Kluivers,<br>Department of Obstetrics<br>and Gynaecology, Radboud<br>university medical center,<br>Geert Grooteplein Zuid 10,<br>6525 GA, Nijmegen, The<br>Netherlands                        |                                                                                          | 19-9-2022         |
| Researcher who will perform the<br>statistical analysis | Rosje Enklaar and<br>Sascha Schultem<br>Department of Obstetrics<br>and Gynaecology, Radboud<br>university medical center,<br>Geert Grooteplein Zuid 10,<br>6525 GA, Nijmegen, The<br>Netherlands            | <br> | 19-9-2022         |
| Methodologist/statistician<br>consulted                 | Marijke C. van der Weide<br>Department of Obstetrics<br>and Gynaecology,<br>Amsterdam University<br>Medical Centre, University<br>of Amsterdam,<br>Meibergdreef 9, 1105 AZ,<br>Amsterdam, The<br>Netherlands |                                                                                         | 19-9-2022         |
| Contributor to statistical analysis<br>plan             |                                                                                                                                                                                                              |                                                                                                                                                                             |                   |
| —                                                       |                                                                                                                                                                                                              |                                                                                                                                                                             |                   |



17 **Revision history of statistical analysis plan**

18 The revision history of the statistical analysis plan includes a version number, date of approval, summary of  
19 changes, justification of revision and timing of the revisions with respect to changes to the protocol, data safety  
20 monitoring board meetings, interim analyses and the final analyses. The revision history should be formally  
21 filed (for example in the trial master file). It does not need to contain all versions made in the internal process  
22 of producing a new filed version.

23

24

| Updated statistical analysis plan version | Protocol version | Section number(s) changed | Description of and reason for changes | Date of approval |
|-------------------------------------------|------------------|---------------------------|---------------------------------------|------------------|
| 1.0                                       |                  |                           |                                       |                  |
| 2.0                                       |                  |                           |                                       |                  |
| 3.0                                       |                  |                           |                                       |                  |
| ...                                       | ...              | ...                       | ...                                   | ...              |

25

26

28 **Inhoud**

|    |                                                                               |           |
|----|-------------------------------------------------------------------------------|-----------|
| 29 | <b>1. List of abbreviations .....</b>                                         | <b>8</b>  |
| 30 | <b>2. Introduction .....</b>                                                  | <b>8</b>  |
| 31 | 2.1 Background.....                                                           | 8         |
| 32 | 2.2 Objective.....                                                            | 8         |
| 33 | <b>3. Endpoints .....</b>                                                     | <b>8</b>  |
| 34 | 3.1 Primary endpoint.....                                                     | 8         |
| 35 | 3.2 Secondary endpoints.....                                                  | 9         |
| 36 | <b>4. Study methods .....</b>                                                 | <b>10</b> |
| 37 | 4.1 Study design .....                                                        | 10        |
| 38 | 4.2 Study population .....                                                    | 10        |
| 39 | 4.3 Inclusion criteria .....                                                  | 10        |
| 40 | 4.4 Exclusion criteria .....                                                  | 10        |
| 41 | 4.5 Treatment of subjects .....                                               | 10        |
| 42 | 4.6 Blinding.....                                                             | 11        |
| 43 | 4.7 Randomisation procedure.....                                              | 11        |
| 44 | <b>5. Sample-size .....</b>                                                   | <b>11</b> |
| 45 | <b>6. Analysis considerations .....</b>                                       | <b>11</b> |
| 46 | 6.1 Analysis populations.....                                                 | 11        |
| 47 | 6.2 Covariates and Subgroups.....                                             | 12        |
| 48 | 6.3 Missing Data .....                                                        | 12        |
| 49 | 6.4 Interim Analyses and Data Monitoring .....                                | 12        |
| 50 | <b>7. Efficacy analyses.....</b>                                              | <b>13</b> |
| 51 | 7.1 Timing of final statistical analysis .....                                | 13        |
| 52 | 7.2 Primary endpoint analysis .....                                           | 13        |
| 53 | 7.3 Secondary endpoint analyses.....                                          | 13        |
| 54 | <b>8. Safety analyses .....</b>                                               | <b>13</b> |
| 55 | 8.1 Adverse events .....                                                      | 13        |
| 56 | 8.2 Deaths, Serious Adverse Events and other Significant Adverse Events ..... | 14        |
| 57 | <b>9. Other analyses.....</b>                                                 | <b>14</b> |
| 58 | <b>10. Comparison to study protocol .....</b>                                 | <b>14</b> |

|    |                                                                       |           |
|----|-----------------------------------------------------------------------|-----------|
| 59 | <b>11. Presentation of study results.....</b>                         | <b>15</b> |
| 60 | 11.1 Recruitment.....                                                 | 15        |
| 61 | 11.2 Protocol violations.....                                         | 15        |
| 62 | 11.3 Baseline characterisations.....                                  | 15        |
| 63 | 11.4 Primary outcome.....                                             | 15        |
| 64 | 11.5 Secondary outcome(s).....                                        | 15        |
| 65 | <b>12. Definitions of variables.....</b>                              | <b>16</b> |
| 66 | 12.1 Primary outcome.....                                             | 16        |
| 67 | 12.2 Secondary outcomes.....                                          | 16        |
| 68 | 12.3 Other outcomes.....                                              | 17        |
| 69 | <b>13. Tables.....</b>                                                | <b>18</b> |
| 70 | 13.1 Baseline characteristics.....                                    | 18        |
| 71 | 13.2 Primary outcome.....                                             | 19        |
| 72 | 13.3 Safety outcomes.....                                             | 20        |
| 73 | 13.4 Other secondary outcomes.....                                    | 20        |
| 74 | 13.5 Secondary outcome (surgery related morbidity/complications)..... | 24        |
| 75 | <b>14. Figures.....</b>                                               | <b>29</b> |
| 76 | 14.1 Flowchart of participants.....                                   | 29        |
| 77 | <b>15. References.....</b>                                            | <b>30</b> |
| 78 |                                                                       |           |
| 79 |                                                                       |           |

80 **1. List of abbreviations**

- 81 • POP: pelvic organ prolapse
- 82 • POP-Q: pelvic organ prolapse quantification
- 83 • SSH: sacrospinous hysteropexy
- 84 • MM: modified Manchester operation
- 85 • ITT: intention to treat analysis
- 86 • PP: per protocol analysis
- 87 • SPSS: Statistical Package for the Social Sciences
- 88 • SD: standard deviation
- 89 • IQR: interquartile range
- 90 • PFDI-20: Pelvic Floor Distress Inventory-20, questionnaire
- 91 • POPDI-6: Pelvic Organ Prolaps Distress Inventory 6
- 92 • UDI-6: Urogenital Distress Inventory 6 questionnaire
- 93 • PFIQ-7: Pelvic Floor Impact Questionnaire-7, questionnaire
- 94 • PGI-I: Patient Global Impression of Improvement
- 95 • PISQ-IR: Pelvic Organ Prolapse/Urinary Incontinence Sexual Questionnaire, IUGA-revised
- 96 • EQ5D5L: EuroQol quality of life questionnaire, 5 levels.

97 **2. Introduction**

98 **2.1 Background**

99 A detailed study background is provided in the published study protocol.(1)  
100 Pelvic organ prolapse affects up to 40% of parous women which adversely affects the quality of life.  
101 During a life time, 20% of all women will undergo an operation. In general the guidelines advise a  
102 vaginal operation in case of an uterine descent: hysterectomy with uterosacral ligament plication,  
103 sacrospinous hysteropexy (SSH) or a modified Manchester operation (MM). Previous studies have  
104 shown the non-inferiority between SSH and vaginal hysterectomy. Whether or not SSH and MM are  
105 comparable concerning anatomical and functional outcome is still unknown. The practical application  
106 of both operations is at least in The Netherlands a known cause of practice pattern variation. To  
107 reveal any difference between both techniques the SAM study was designed.

108 **2.2 Objective**

109 The objective of this study is to compare the non-inferiority of SSH to MM in the treatment of uterine  
110 prolapse with POP-Q point D  $\leq$  minus 1cm.

111 **3. Endpoints**

112 **3.1 Primary endpoint**

113 The primary outcome will be success after two years follow-up. Success is defined as:

- 114 • The absence of POP beyond the hymen in any compartment (POP-Q), and
- 115 • The absence of bulge symptoms (absence of bulge symptoms is defined as a negative  
116 response to the question, “Do you usually have a bulge or something falling out that you  
117 can see or feel in your vaginal area” (PFDI-20 POPDI-6 domain question 3; score: 0), and
- 118 • Absence of reoperation or pessary therapy for POP



119 **3.2 Secondary endpoints**

120 The secondary outcomes are listed below.

121 **3.2.1 Perioperative data**

122 3.2.1.1 Clinical parameters

123 a) Surgery time (minutes of operating time, to be found in operation report)

124 b) Hospitalisation time (time from day of operation to day of discharge)

125

126 3.2.1.2 Surgery related morbidity/complications

127 a) Menstrual problems

128 b) Hematometra

129 c) Any problems with uterine access (such as diagnostic cervical or endometrial sampling or  
130 Intra-uterine device insertion)

131 d) Infection needing antibiotics

132 e) Urinary retention (>200mL residual urine or prolonged catheterization (minimum of 24h  
133 after first removal of CAD)

134 f) Fever (>38, measured two times (minimal 12 hours apart))

135

136 **3.2.2 Other endpoints**

137 a) Subjective outcomes (patient reported outcomes)

138 i) Presence or absence of vaginal bulge (PFDI-20 question 3).

139 ii) Pain perception, e.g. buttock pain and dyspareunia (positive answer during follow-up  
140 consultation including Numeric Rating Scale (NRS)), or pain in other location with  
141 specification of that location.

142 iii) Disease specific quality of life regarding symptoms and impact of symptoms (PFIQ-7,  
143 PFDI-20, PGI-I)

144 iv) Sexual function (PISQ-IR)

145 v) General quality of life (EQ5D-5L)

146 vi) Clinical outcomes: lower urinary tract symptoms, stress urinary incontinence or bowel  
147 (PFDI-20)

148 b) Anatomical outcomes:

149 i) Anatomy in all compartments using POP-Q

150 ii) Anatomical failure ( $\geq$ POP-Q IIb, i.e. prolapse beyond the hymen (>0 cm))

151 c) Further surgery:

152 i) Repeat surgery for de novo POP (different site than index surgery)

153 ii) Repeat surgery in the same compartment for POP symptom recurrence

154 iii) Surgery for complications (pain, infection or haemorrhage)

155 iv) Surgery for non-POP related conditions (i.e urinary or fecal incontinence)

156 d) Further treatments for POP or urinary incontinence (i.e. pelvic floor physiotherapy, pessary,  
157 consultation urology, extensive pelvic floor ultrasound or medication)

158 e) Abnormal cervical pathology after modified Manchester (pathology report)

159 f) Further treatments for related problems such as menstrual disorders, endometrial or cervical  
160 malignancies.

161 g) Costs

162

## 163 **4. Study methods**

### 164 **4.1 Study design**

165 The SAM study is a multicentre, non-inferiority, open label, randomized controlled trial. The study  
166 investigates the non-inferiority of SSH compared to MM in a 1:1 ratio. For detailed description of the  
167 interventions, see the study protocol (BMC Schulten 2019). (1)

### 168 **4.2 Study population**

169 Women aged 18 or older who are eligible for their first surgical treatment for symptomatic pelvic  
170 organ prolapse in any stage and with uterine descent and POP-Q point D at  $\leq$  minus 1cm will be  
171 eligible for the study. In order to check eligibility for participation, the POP-Q will be performed at  
172 the outpatient clinic before counselling.

### 173 **4.3 Inclusion criteria**

174 The following criteria must be met to be included in the study:

- 175 • Women aged 18 or older
- 176 • Eligible for first surgical treatment for symptomatic pelvic organ prolapse in any stage
- 177 • With uterine descent and POP-Q point D at  $\leq$  minus 1cm

### 178 **4.4 Exclusion criteria**

179 A potential subject who meets any of the following criteria will be excluded from participation in this  
180 study:

- 181 • Previous prolapse or other pelvic floor surgery
- 182 • Need concomitant mid-urethral sling surgery
- 183 • Wish or need for uterus removal (In case indicated, a pap-smear and/or pipelle endometrial  
184 biopsy must be normal before inclusion.)
- 185 • Contraindication for uterus preservation (i.e. abnormal endometrial bleeding, endometrial or  
186 cervical malignancy)
- 187 • Future wish for childbearing
- 188 • Inadequate skills in the Dutch language or are not capable of filling in questionnaires

189

### 190 **4.5 Treatment of subjects**

191 The interventions for SAM study include two types of surgical correction.

#### 192 **4.5.1 Surgical procedures**

- 193 • SSH: after opening the posterior vaginal wall, the pararectal space is explored at the right  
194 side and the sacrospinous ligament is identified. The posterior side of the cervix is attached  
195 to the sacrospinous ligament with two non-absorbable size 1 or 0 sutures at least 2 cm  
196 medial of the ischial spine. Either this procedure is performed open or using the Capio  
197 suturing device.
- 198 • MM: the procedure consists of extraperitoneal plication of the uterosacral ligaments (and  
199 cardinal ligaments where possible) with use of three or four absorbable size 1 sutures and  
200 amputation of the cervix. The most cranial suture is fixated through the posterior fornix of  
201 the vagina.

202

#### 203 **4.6 Blinding**

204 Due to the nature of the investigational treatments, the patients and treating physician are not  
205 blinded to treatment allocation. The POP-Q at 12 and 24 months will be performed by a different  
206 researcher than the operating gynaecologist. All analyses will be performed in a blinded fashion.

#### 207 **4.7 Randomisation procedure**

208 Randomization to treatment MM or treatment SSH will be executed in a ratio of 1:1 using dynamic  
209 randomization with blocks in variable block sizes 2, 4, 6 in online software Castor (version 2018.3.11,  
210 Castor Electronic Data Capture Amsterdam)). No stratification is applied in this study.

211

### 212 **5. Sample-size**

213 The sample size calculation was based on the expected comparability between the two techniques  
214 regarding the success composite of recurrent signs and symptoms of POP after two-years follow-up.  
215 A success rate of 89% for both SSH and MM, two years after the intervention, is expected. The actual  
216 treatment group proportion was set at 89% with a non-inferiority margin of 9%, assuming SSH to be  
217 below 80% under the null hypothesis of inferiority. Based on a power of 80% and the significance  
218 level of the test ( $\alpha$ ) targeted at 0.025, sample sizes of 193 per group need to be included in the study.  
219 With an expected loss to follow-up of 10%, a total of 430 women are needed.

### 220 **6. Analysis considerations**

#### 221 **6.1 Analysis populations**

222 Definitions of analysis populations: Intention-to-treat and Per-protocol.

##### 223 **6.1.1 Full Analysis Population (ITT)**

224 The intention-to-treat (ITT) population will consist of all patients who have given consent and have  
225 been allocated to one of the two treatments, irrespective of treatment received. This population  
226 consists of all patients of whom the primary outcome (POP-Q, questionnaire and information  
227 concerning reintervention for recurrent prolapse) is complete at 24 months of follow-up.

##### 228 **6.1.2 Per Protocol Population**

229 A per-protocol (PP) analysis will be done complementary to the ITT analysis. This means that non-  
230 inferiority has to be demonstrated in both the ITT and PP analysis to declare non-inferiority. This will  
231 be done for the primary outcome and the two composite secondary outcomes (surgical failure of the  
232 apical compartment and overall surgical failure). In the PP population patients with the following  
233 characteristics will be excluded from the analysis:

- 234 • Major protocol deviations (see 6.1.3)

##### 235 **6.1.3 Definition of protocol violations**

236 Randomized women who appear to fail inclusion and exclusion criteria (eligibility violations) during  
237 blinded data review after all follow-up visits are finalized and all data has been collected, will be  
238 excluded from the ITT and PP analysis. This will only be done for criteria that were present at the  
239 time of randomisation. Women who appear to fail the in-/exclusion criteria during the inclusion  
240 period will be replaced according to the same criteria as mentioned above.

241 (see chapter 5). Two clinicians will review the cases and where there are discrepancies, a third will  
242 be consulted.  
243  
244 Furthermore, the following protocol violations will be considered, of which major protocol violations  
245 will be excluded from PP analysis:  
246 Major:  
247       ○ Other intervention than randomized (e.g. other or no repair of apical compartment  
248       than randomized, only cervical amputation without plication of ligaments)  
249       ○ Cervical amputation in SSH  
250       ○ Concomitant sling or other urinary incontinence surgery  
251       ○ Concomitant major other procedures during study procedure  
252 Minor:  
253       ○ Other type of device than Capiro for SSH when closed procedure of SSH is performed  
254       ○ >4 sacro-uterine stitches during MM procedure  
255       ○ No cervical amputation in MM  
256       ○ Concomitant minor other procedures during study procedure, such as laparoscopy  
257  
258 All major protocol violations mentioned in this section will be line-listed according to treatment  
259 group. In addition, the number and percentage of patients in each treatment group experiencing one  
260 or more protocol deviations will be presented.

261

## 262 **6.2 Covariates and Subgroups**

263 Subgroup analyses are planned to investigate the possible decreased or increased effects of the POP  
264 surgery with MM versus SSH in the following pre-specified subgroups in the ITT population:

- 265 - Age in years
- 266 - Menopausal status (yes vs. no)
- 267 - Usage of local estrogen (yes vs. no)
- 268 - Sexual activity (yes vs. no)
- 269 - POP-Q stage preoperative (stage II vs. stage III or IV)
- 270 - Cervical elongation (yes vs. no)
- 271 - Concomitant vaginal repair in anterior and posterior compartment (yes vs. no)
- 272 - Symptoms at 24m follow-up

273 Subgroup analyses will be conducted by adding an interaction term to the model and testing for the  
274 statistical significance of this interaction term. The results of the subgroup analyses will be presented  
275 regardless of the statistical significance (in the appendix, table 1).

## 276 **6.3 Missing Data**

277 Data on the primary outcome must be collected after 24 months follow-up, and missing data may be  
278 expected. However, drop-out has been allowed for in the sample size and complete case analysis is  
279 preferred. No imputation for the primary outcome will be used. Characteristics of complete and  
280 incomplete cases will be presented in an appendix (table 2).

## 281 **6.4 Interim Analyses and Data Monitoring**

282 No interim analyses are planned.

283

## 284 **7. Efficacy analyses**

### 285 **7.1 Timing of final statistical analysis**

286 The statistical analyses of the primary outcome and secondary outcomes (measured 24 months after  
287 surgery) will be performed after a minimum of 24 months have elapsed from the inclusion of the  
288 final patient in the study and data cleaning for these outcomes has been completed.

289 The statistical analysis of the secondary outcome sexual functioning will be performed after a  
290 minimum of 12 months have elapsed from the inclusion of the final patient in the study and data  
291 cleaning for these outcomes has been completed.

### 292 **7.2 Primary endpoint analysis**

293 Regarding the primary outcome, the null hypothesis entails that the success rate of SSH is inferior by  
294 a margin of 9% compared to MM. If the lower limit of the 95% confidence interval does not exceed  
295 the margin of -9%, the null hypothesis is rejected, and we will consider SSH to be non-inferior to  
296 MM. This is the main statistical analysis and will be performed both in the intention to treat (ITT) and  
297 per protocol (PP) population. This means that non-inferiority has to be demonstrated in both the ITT  
298 and PP analysis to declare non-inferiority of SSH compared to MM. The treatment effect will be  
299 expressed as relative risk and risk difference with a 95% confidence interval. Using the Farrington-  
300 Manning test, the non-inferiority hypothesis will be tested using the predetermined non-inferiority  
301 margin of 9% (risk difference). In the primary analysis no adjustments for covariates will be applied.

302 The analyses will be performed with IBM SPSS Statistics (version 25, Armonk, New York, United  
303 States) and SAS (version 9.4).

### 304 **7.3 Secondary endpoint analyses**

305 For other (secondary) outcomes, summaries of continuous data will be presented as mean  $\pm$   
306 standard deviation or median and (interquartile) range depending on their distribution. Categorical  
307 data will be presented as frequencies. When appropriate, differences between groups will be  
308 analysed using the Student's t test or Mann-Whitney test for continuous data. Mean differences and  
309 the corresponding 95% confidence intervals will be presented along with the p-value from the t-test  
310 (when applicable). For the comparison of not normal distributed data, the 95% confidence intervals  
311 corresponding with the median (and interquartile range) will be calculated. Comparisons with  
312 categorical data will be analysed using the Chi-square test or the Fisher's exact test or relative risks  
313 when applicable.

314

## 315 **8. Safety analyses**

### 316 **8.1 Adverse events**

317 Adverse event data will be analysed as allocated (intention-to-treat). Adverse events will be  
318 presented in a table per surgical procedure. Expected differences include: higher amount of patients  
319 with urinary retention after SSH.

320 **8.1.1 Perioperative complications**

- 321 1) Bladder lesion (yes/no)
- 322 2) Ureter lesion (yes/no)
- 323 3) Urethral lesion (yes/no)
- 324 4) Bowel lesion (yes/no)
- 325 5) Blood loss >500cc (yes/no)
- 326 6) Blood transfusion (yes/no)
- 327 7) Anesthetic event (yes/no)
- 328 8) Other (all complications that are not mentioned above with an explanation in the text)

329

330 **8.1.2 Postoperative complications**

331 *All complications occurring within the first 6 weeks post-operative. Complications longer than 6 weeks*  
332 *post-operative will only be reported if evidently related to the surgical procedures of this study.*

- 333 1) Urinary retention or residual urine (yes/no), > 200mL residual urine or prolonged catheterization  
334 (minimum of 24h after first removal of CAD)
- 335 2) Infection (yes/no)
  - 336 a) Temp>38, measured twice in 12 hours (yes/no)
  - 337 b) UTI within 6 weeks after the initial operation (yes/no)
  - 338 c) Pyelonephritis (yes/no)
  - 339 d) Wound infection/abcess (yes/no)
  - 340 e) Other (yes/no)
- 341 3) Delayed hemorrhage (yes/no)
- 342 4) Blood transfusion (yes/no)
- 343 5) Hematoma (yes/no)

344

345 **8.2 Deaths, Serious Adverse Events and other Significant Adverse Events**

346 Serious adverse events will not be coded but will be described per allocation group.

- 347 1) Re-operation
- 348 2) Re-hospitalization
- 349 3) Death

350

351 **9. Other analyses**

352 We will do sensitivity analyses for secondary outcomes to evaluate the difference between imputed  
353 and non-imputed variables. A prognostic marker analysis will be performed to assess which baseline  
354 characteristics of the women have prognostic value and/or can be used as treatment selection  
355 markers.

356 Subgroup analysis mentioned in section 6.2 is seen as hypothesis generating.

357

358 **10. Comparison to study protocol**

359 The current analysis plan is largely based on the published SAM study protocol.(1) Slight changes  
360 were made and these are listed below:

361

- 362 • Bulge symptoms in the primary outcome will be defined as a negative response to the third  
363 question of the PFDI-20 (“Do you usually have a bulge or something falling out that you can see  
364 or feel in your vaginal area” (PFDI-20 question 3, POPDI-6 domain; score: 0) instead of “Do you  
365 feel or see a bulge in the vaginal area” of the UDI questionnaire.
- 366 • Subgroup analysis for patients who use local hormone therapy (yes vs. no)
- 367 • Composite outcome separate: anatomical failure, bulge symptoms, re-operation.
- 368 • Gynaecological examination as part of the primary outcome is specified: POP-Q will be sufficient  
369 to determine the primary outcome.
- 370 • The sample size calculation has been changed after the publication of the protocol due to  
371 recalculation of the expected loss to follow-up percentage. We have increased the sample size to  
372 430 patients, instead of 424.
- 373 • Urinary retention or residual urine specified as :  $\geq 200$ mL residual urine or prolonged  
374 catheterization (minimum of 24h after first removal of CAD)

375

## 376 **11.Presentation of study results**

### 377 **11.1 Recruitment**

378 The recruitment of study participants will be presented using the CONSORT flow diagram.

379

### 380 **11.2 Protocol violations**

381 All protocol violations mentioned in section 6.1.2 and this section will be line-listed according to  
382 allocation group. In addition, the number and percentage of patients in each allocation group  
383 experiencing one or more protocol deviations will be presented.

384

### 385 **11.3 Baseline characterisations**

386 The baseline characteristics will be presented for the total population as randomised (intention-to-  
387 treat), using the format of the mock table included in section 13.

388 Data will be presented using absolute numbers with percentages for discrete outcomes. Continuous  
389 outcomes will be presented as means with standard deviation, or medians with interquartile ranges.

390

### 391 **11.4 Primary outcome**

392 The primary outcome will be presented for the total population as randomised (intention-to-treat)  
393 and per protocol per allocation group. Data will be presented using absolute numbers with  
394 percentages for discrete outcomes. The risk difference will be presented together with 95%  
395 confidence interval.

396

### 397 **11.5 Secondary outcome(s)**

398 The secondary outcomes will be presented for the total population as randomised (intention-to-  
399 treat) per allocation group. The two composite outcome measures (overall surgical failure and

400 surgical failure of the apical compartment) will be analysed per protocol as well for comparison with  
401 SAVE-U trial and LAVA trial(2, 3). Data will be presented using absolute numbers with percentages for  
402 discrete outcomes. Relative Risk or mean difference will be presented together with 95% confidence  
403 interval and p-value.

404

## 405 **12. Definitions of variables**

### 406 **12.1 Primary outcome**

#### 407 Composite success:

- 408 • The absence of POP beyond the hymen in any compartment (success is most descended  
409 POP-Q point smaller or equal to 0 cm), and
- 410 • The absence of bulge symptoms (absence of bulge symptoms is defined as a negative  
411 response to the question, “Do you usually have a bulge or something falling out that you  
412 can see or feel in your vaginal area” (PFDI-20 POPDI-6 domain question 3; score: 0)), and
- 413 • Absence of reoperation or pessary therapy for POP

414 Numbers 1 to 3 will be computed into a composite variable. Only if all three criteria are met, this will  
415 be defined as ‘success’=1. If one or more out of the three criteria is not met, this will be defined as  
416 ‘no success’=0.

417

### 418 **12.2 Secondary outcomes**

- 419 • Surgical failure of the apical compartment: Recurrent apical prolapse stage  $\geq 2$  with  
420 bothersome symptoms or repeat surgery for apical prolapse
- 421 • Overall surgical failure: Prolapse POP-Q stage  $\geq 2$  (any compartment) or repeat surgery or  
422 pessary use.
- 423 • Anatomical failure: POP-Q C and/or Ba and/or Bp stage  $> 2$   
424 → If one or more out of the three criteria is met, this will be defined as ‘anatomical failure’  
425 =1. No failure=0.
- 426 • Prolapse beyond the hymen: POP-Q C and/or Ba and/or Bp  $> 0$   
427 → If one or more out of the three criteria is met, this will be defined as ‘anatomical failure’  
428 =1. No failure=0.
- 429 • Subjective recurrence: the presence of bulge symptoms (presence of bulge symptoms is  
430 defined as a positive response to the question from the PFDI-20 domain genital prolapse “Do  
431 you usually have a bulge or something falling out that you can see or feel in your vaginal  
432 area? in combination with a response ‘somewhat bothered’ to ‘very much bothered’ to the  
433 question ‘how much does this bother you?’)
- 434 • Repeat surgery in the same compartment for POP symptom recurrence
  - 435 ○ Anterior compartment: reoperation for POP recurrence in anterior compartment  
436 (anterior colporrhaphy) and previous operated anterior compartment
  - 437 ○ Apical compartment: reoperation for POP recurrence in apical compartment (defined  
438 as apical surgery or other surgery in CRF), all participants have undergone apical  
439 surgery (except the cases with a protocol violation and no surgery according to the



- 440 study protocol). Patients with an apical surgical technique but not according to the  
441 protocol will be included as well (according to the intention to treat analysis).  
442 ○ Posterior compartment: reoperation for POP recurrence in posterior compartment  
443 (posterior colporrhaphy) and previous operated posterior compartment  
444 ● Repeat surgery for de novo POP (different site than index surgery)  
445 ○ Anterior compartment: reoperation for POP in anterior compartment which is not  
446 previously operated.  
447 ○ Apical compartment: reoperation for POP in apical compartment which is not  
448 previously operated. This is limited to only the cases with a protocol violation (no  
449 operation according to study protocol = no apical surgery), since every other patients  
450 underwent apical surgery.  
451 ○ Posterior compartment: reoperation for POP in posterior compartment which is not  
452 previously operated.  
453 ● Surgery for complications  
454 ● Pessary use for POP complaints  
455 ● Duration of hospital stay (date of discharge minus date of admission)  
456 ● BMI: kg/m<sup>2</sup>  
457 ● Cervical elongation: POP-Q point D minus POP-Q point C.  
458

459 **12.3 Other outcomes**

- 460 ● Patient reported outcomes based on questionnaires. Scores of the questionnaires will be  
461 calculated in line with the questionnaire instruction.  
462

463 **13. Tables**

464 **13.1 Baseline characteristics**

465 **Table 1. Baseline characteristics. Value are numbers (percentages) unless stated otherwise**

466

| Characteristics                                   | Sacrospinous hysteropexy (n=...) | Modified Manchester (n=...) |
|---------------------------------------------------|----------------------------------|-----------------------------|
| Age, median (range)                               | Median (IQR)                     | Median (IQR)                |
| Highest educational level:                        |                                  |                             |
| Primary or secondary school                       | NNN (%)                          | NNN (%)                     |
| High school                                       | NNN (%)                          | NNN (%)                     |
| Bachelor, master or academic degree               | NNN (%)                          | NNN (%)                     |
| Comorbidity:                                      |                                  |                             |
| Cardiovascular disease                            | NNN (%)                          | NNN (%)                     |
| Diabetes mellitus                                 | NNN (%)                          | NNN (%)                     |
| Respiratory disease                               | NNN (%)                          | NNN (%)                     |
| Smoker                                            | NNN (%)                          | NNN (%)                     |
| Postmenopausal                                    | NNN (%)                          | NNN (%)                     |
| No of vaginal deliveries, median (range)          | Median (IQR)                     | Median (IQR)                |
| No of caesarean deliveries median (range)         | Median (IQR)                     | Median (IQR)                |
| No of assisted vaginal deliveries, median (range) | Median (IQR)                     | Median (IQR)                |
| Positive family history for prolapse              | NNN (%)                          | NNN (%)                     |
| Body mass index, mean (SD)                        | Mean (SD)                        | Mean (SD)                   |
| Caucasian                                         | NNN (%)                          | NNN (%)                     |
| POP-Q stage uterine prolapse (point C)            |                                  |                             |
| 2                                                 | NNN (%)                          | NNN (%)                     |
| 3                                                 | NNN (%)                          | NNN (%)                     |
| 4                                                 | NNN (%)                          | NNN (%)                     |
| Prolapse beyond hymen                             |                                  |                             |
| Anterior (POP-Q Aa or Ba > 0)                     | NNN (%)                          | NNN (%)                     |
| Apical (POP-Q C > 0)                              | NNN (%)                          | NNN (%)                     |
| Posterior (POP-Q Ap or Bp > 0)                    | NNN (%)                          | NNN (%)                     |
| Overall POP-Q stage                               |                                  |                             |
| 2                                                 | NNN (%)                          | NNN (%)                     |
| 3                                                 | NNN (%)                          | NNN (%)                     |
| 4                                                 | NNN (%)                          | NNN (%)                     |

POP-Q=pelvic organ prolapse quantification.

467

468

## 13.2 Primary outcome

**Table 2. Outcomes for pelvic organ prolapse at 2year follow-up. Data are presented as numbers (percentages) stated otherwise.**

| Outcomes                                    | Sacrospinous hysteropexy | Modified Manchester | Risk difference (95% CI) |
|---------------------------------------------|--------------------------|---------------------|--------------------------|
| <b>Composite outcome success*</b>           |                          |                     |                          |
| ITT analysis                                | NNN/nnn (%)              | NNN (%)             | X.X (95% CI)             |
| Per protocol analysis                       | NNN (%)                  | NNN (%)             | X.X (95% CI)             |
| <b>Surgical failure apical compartment§</b> |                          |                     |                          |
| ITT analysis                                | NNN (%)                  | NNN (%)             | X.X (95% CI)             |
| Per protocol analysis                       | NNN (%)                  | NNN (%)             | X.X (95% CI)             |
| <b>Overall surgical failure†</b>            |                          |                     |                          |
| ITT analysis                                | NNN (%)                  | NNN (%)             | X.X (95% CI)             |
| Per protocol analysis                       | NNN (%)                  | NNN (%)             | X.X (95% CI)             |
| <b>Anatomical failure‡</b>                  |                          |                     |                          |
| Overall anatomical failure                  | NNN (%)                  | NNN (%)             | X.X (95% CI)             |
| Anterior compartment                        | NNN (%)                  | NNN (%)             | X.X (95% CI)             |
| Apical compartment                          | NNN (%)                  | NNN (%)             | X.X (95% CI)             |
| Posterior compartment                       | NNN (%)                  | NNN (%)             | X.X (95% CI)             |
| <b>Prolapse beyond the hymen</b>            |                          |                     |                          |
| Anterior (POP-Q Ba > 0)                     | NNN (%)                  | NNN (%)             | X.X (95% CI)             |
| Apical (POP-Q C > 0)                        | NNN (%)                  | NNN (%)             | X.X (95% CI)             |
| Posterior (POP-Q Bp > 0)                    | NNN (%)                  | NNN (%)             | X.X (95% CI)             |
| <b>Bothersome bulge symptoms</b>            |                          |                     |                          |
| <b>Pessary therapy</b>                      |                          |                     |                          |
| First year postoperative                    | NNN (%)                  | NNN (%)             | X.X (95% CI)             |
| Second year post-operative                  | NNN (%)                  | NNN (%)             | X.X (95% CI)             |
| <b>Repeat surgery ††</b>                    |                          |                     |                          |
| Repeat surgery in operated compartment      | NNN (%)                  | NNN (%)             | X.X (95% CI)             |
| Anterior compartment                        | NNN (%)                  | NNN (%)             | X.X (95% CI)             |
| Apical compartment                          | NNN (%)                  | NNN (%)             | X.X (95% CI)             |
| Posterior compartment                       | NNN (%)                  | NNN (%)             | X.X (95% CI)             |
| Repeat surgery in non-operated compartment  | NNN (%)                  | NNN (%)             | X.X (95% CI)             |
| Anterior compartment§§                      | NNN (%)                  | NNN (%)             | X.X (95% CI)             |
| Apical compartment                          | NNN (%)                  | NNN (%)             | X.X (95% CI)             |
| Posterior compartment                       | NNN (%)                  | NNN (%)             | X.X (95% CI)             |
| <b>Surgery for non-prolapse conditions</b>  |                          |                     |                          |
| Urinary incontinence                        | NNN (%)                  | NNN (%)             | X.X (95% CI)             |
| Hysterectomy                                | NNN (%)                  | NNN (%)             | X.X (95% CI)             |
| Other‡‡                                     | NNN (%)                  | NNN (%)             | X.X (95% CI)             |

ITT=intention to treat; \*the absence of POP beyond the hymen in any compartment, and the absence of bulge symptoms (absence of bulge symptoms is defined as a negative response to the question, "Do you usually have a bulge or something falling out that you can see or feel in your vaginal area" (PFDI-20, POPDI-6 domain question 3: 0)), and absence of reoperation or pessary therapy for POP

§Recurrent apical prolapse stage  $\geq 2$  with bothersome symptoms or repeat surgery for apical prolapse

†Prolapse POP-Q stage  $\geq 2$  (any compartment) or repeat surgery or pessary use.

‡POP-Q stage 2 or higher; POP-Q=pelvic organ prolapse quantification; Percentages were calculated using non-missing data.

‡POP-Q stage 2 or higher; POP-Q=pelvic organ prolapse quantification; Percentages were calculated using non-missing data

†† Repeat surgery for prolapse specified:

§§ Repeat surgery in non-operated compartment for patients who received non apical operation which was not according to randomization.

‡‡ Other operations (not prolapse related):

NA: not applicable.

472 **13.3 Safety outcomes**

473 **13.4 Other secondary outcomes**

474 **Table 3. Anatomical outcomes according to POP-Q system preoperative and 2 years postoperative**

| POP-Q point | N   | Sacrospinous hysteropexy |                         | Modified Manchester |                         | Difference in POP-Q baseline versus 2 years postoperative |           |
|-------------|-----|--------------------------|-------------------------|---------------------|-------------------------|-----------------------------------------------------------|-----------|
|             |     | pre-operative            | N 2 years postoperative | N pre-operative     | N 2 years postoperative | SSH                                                       | MM        |
| Aa          | 194 | Mean (SD)                | Mean (SD)               | Mean (SD)           | Mean (SD)               | Mean (SD)                                                 | Mean (SD) |
| Ba          |     | Mean (SD)                | Mean (SD)               | Mean (SD)           | Mean (SD)               | Mean (SD)                                                 | Mean (SD) |
| C           |     | Mean (SD)                | Mean (SD)               | Mean (SD)           | Mean (SD)               | Mean (SD)                                                 | Mean (SD) |
| GH          |     | Mean (SD)                | Mean (SD)               | Mean (SD)           | Mean (SD)               | Mean (SD)                                                 | Mean (SD) |
| Pb          |     | Mean (SD)                | Mean (SD)               | Mean (SD)           | Mean (SD)               | Mean (SD)                                                 | Mean (SD) |
| TVL         |     | Mean (SD)                | Mean (SD)               | Mean (SD)           | Mean (SD)               | Mean (SD)                                                 | Mean (SD) |
| Ap          |     | Mean (SD)                | Mean (SD)               | Mean (SD)           | Mean (SD)               | Mean (SD)                                                 | Mean (SD) |
| Bp          |     | Mean (SD)                | Mean (SD)               | Mean (SD)           | Mean (SD)               | Mean (SD)                                                 | Mean (SD) |
| D           |     | Mean (SD)                | Mean (SD)               | Mean (SD)           | Mean (SD)               | Mean (SD)                                                 | Mean (SD) |

475 Mean (SD), Difference score is based on measurements pre-operative and with 24 months of follow-up.

476

477 *Supplementary material*

478 **Table ... Anatomical outcomes according to POP-Q system preoperative and 1 year postoperative**

| POP-Q point | N   | Sacrospinous hysteropexy |                        | Modified Manchester |                        | Difference in POP-Q baseline versus 1 years postoperative |           |
|-------------|-----|--------------------------|------------------------|---------------------|------------------------|-----------------------------------------------------------|-----------|
|             |     | pre-operative            | N 1 year postoperative | N pre-operative     | N 1 year postoperative | SSH                                                       | MM        |
| Aa          | 194 | Mean (SD)                | Mean (SD)              | Mean (SD)           | Mean (SD)              | Mean (SD)                                                 | Mean (SD) |
| Ba          |     | Mean (SD)                | Mean (SD)              | Mean (SD)           | Mean (SD)              | Mean (SD)                                                 | Mean (SD) |
| C           |     | Mean (SD)                | Mean (SD)              | Mean (SD)           | Mean (SD)              | Mean (SD)                                                 | Mean (SD) |
| GH          |     | Mean (SD)                | Mean (SD)              | Mean (SD)           | Mean (SD)              | Mean (SD)                                                 | Mean (SD) |
| Pb          |     | Mean (SD)                | Mean (SD)              | Mean (SD)           | Mean (SD)              | Mean (SD)                                                 | Mean (SD) |
| TVL         |     | Mean (SD)                | Mean (SD)              | Mean (SD)           | Mean (SD)              | Mean (SD)                                                 | Mean (SD) |
| Ap          |     | Mean (SD)                | Mean (SD)              | Mean (SD)           | Mean (SD)              | Mean (SD)                                                 | Mean (SD) |
| Bp          |     | Mean (SD)                | Mean (SD)              | Mean (SD)           | Mean (SD)              | Mean (SD)                                                 | Mean (SD) |
| D           |     | Mean (SD)                | Mean (SD)              | Mean (SD)           | Mean (SD)              | Mean (SD)                                                 | Mean (SD) |

479 Mean (SD), Difference score is based on measurements pre-operative and with 12 months of follow-up.

480 **Table 5 Patient reported outcomes**

|                                       | Before surgery |           |          |           | 1 year      |           |              |           | 2 years     |                     |              |           | Sig. (p)** TO-T24 |
|---------------------------------------|----------------|-----------|----------|-----------|-------------|-----------|--------------|-----------|-------------|---------------------|--------------|-----------|-------------------|
|                                       | SSH (n=xxx)    |           | MM (n =) |           | SSH (n=xxx) |           | MM (n = xxx) |           | SSH (n=xxx) |                     | MM (n = xxx) |           |                   |
| <b>PFDI-20</b> (mean, SD/median IQR)  | NNN            | Mean ± SD | NNN      | Mean ± SD | NNN         | Mean ± SD | NNN          | Mean ± SD | NNN         | Mean ± SD           | NNN          | Mean ± SD | 0.xx              |
| UDI-6                                 | NNN            | Mean ± SD |          | Mean ± SD |             | Mean ± SD |              | Mean ± SD |             | Mean ± SD           |              | Mean ± SD | 0.xx              |
| CRADI-8                               | etc            | Mean ± SD |          | Mean ± SD |             | Mean ± SD |              | Mean ± SD |             | Mean ± SD           |              | Mean ± SD | 0.xx              |
| POPDI-6                               |                | Mean ± SD |          | Mean ± SD |             | Mean ± SD |              | Mean ± SD |             | Mean ± SD           |              | Mean ± SD | 0.xx              |
| <b>PFIQ-7§</b> (mean, SD/median IQR)  | NNN            | Mean ± SD | NNN      | Mean ± SD | NNN         | Mean ± SD | NNN          | Mean ± SD | NNN         | Mean ± SD           | NNN          | Mean ± SD | 0.xx              |
| UIQ-7                                 | NNN            | Mean ± SD |          | Mean ± SD | NNN         | Mean ± SD |              | Mean ± SD | NNN         | Mean ± SD           |              | Mean ± SD | 0.xx              |
| CRAIQ-7                               | etc            | Mean ± SD |          | Mean ± SD | etc         | Mean ± SD |              | Mean ± SD | etc         | Mean ± SD           |              | Mean ± SD | 0.xx              |
| POPIQ-7                               |                | Mean ± SD |          | Mean ± SD |             | Mean ± SD |              | Mean ± SD |             | Mean ± SD           |              | Mean ± SD | 0.xx              |
| No complaints, n (%)                  |                |           |          |           |             |           |              |           |             |                     |              |           |                   |
| <b>PISQ-IR</b> (mean, SD/median IQR)  | NNN            | Mean ± SD | NNN      | Mean ± SD | NNN         | Mean ± SD | NNN          | Mean ± SD | etc         |                     |              |           | 0.xx              |
| Sexually active                       | NNN            | Mean ± SD |          | Mean ± SD | NNN         | Mean ± SD |              | Mean ± SD |             |                     |              |           | 0.xx              |
| Sexually inactive                     |                | Mean ± SD |          | Mean ± SD |             | Mean ± SD |              | Mean ± SD |             |                     |              |           | 0.xx              |
| <b>EQ-5D-5L</b> (mean, SD/median IQR) | NNN            | Mean ± SD | NNN      | Mean ± SD | NNN         | Mean ± SD |              |           | NNN         | Mean ± SD           |              |           |                   |
| Mobility                              | NNN            | Mean ± SD | NNN      | Mean ± SD | NNN         | Mean ± SD |              |           | NNN         | Mean ± SD           |              |           | 0.xx              |
| Self-care                             |                | Mean ± SD |          | Mean ± SD |             | Mean ± SD |              |           |             | Mean ± SD           |              |           | 0.xx              |
| Usual activities                      |                |           |          |           |             |           |              |           |             |                     |              |           | 0.xx              |
| Pain                                  |                |           |          |           |             |           |              |           |             |                     |              |           | 0.xx              |
| Anxiety                               |                |           |          |           |             |           |              |           |             |                     |              |           | 0.xx              |
| EQ-VAS                                |                |           |          |           |             |           |              |           |             |                     |              |           | 0.xx              |
| <b>PGI-I</b>                          |                |           |          |           |             |           |              |           |             |                     |              |           | 0.xx              |
| Very much better                      | -              |           | -        |           |             | N (%)     |              | N (%)     |             | N (%)               |              | N (%)     | 0.xx              |
| Much better                           | -              |           | -        |           |             |           |              |           |             |                     |              |           | 0.xx              |
| Minimally better                      | -              |           | -        |           |             |           |              |           |             |                     |              |           | 0.xx              |
| No change                             | -              |           | -        |           |             |           |              |           |             |                     |              |           | 0.xx              |
| Minimally worse                       | -              |           | -        |           |             |           |              |           |             |                     |              |           | 0.xx              |
| Much worse                            | -              |           | -        |           |             |           |              |           |             |                     |              |           | 0.xx              |
| Very much worse                       | -              |           | -        |           |             |           |              |           |             |                     |              |           | 0.xx              |
| <b>PGI-I success*</b>                 |                |           |          |           |             | SSH       |              | MM        |             | Risk ratio (95% CI) |              |           | Sig. (p)          |
| 12 months                             |                |           |          |           |             | N (%)     |              | N (%)     |             | RR (95%CI)          |              |           | 0.xx              |
| 24 months                             |                |           |          |           |             | N (%)     |              | N (%)     |             | RR (95%CI)          |              |           |                   |

---

PFDI-20: Pelvic Floor Disability Index-20, higher scores indicate more symptom distress.

PFIQ-7: Pelvic Floor Impact Questionnaire-7, higher scores indicate more impact on daily activity.

PISQ-IR: Pelvic Organ Prolapse/Urinary Incontinence Sexual Questionnaire, IUGA-Revised, scores are total scores, not subdomains (score ranges from 1 (worse sexual experience) to 5 (better sexual experience)).

EQ5D-5L: EuroQol 5 dimensions-5 levels, index-scores calculated with EQ-5D value set for the Netherlands. EQ-VAS: EuroQol vertical visual analogue scale, patient's self-rated health (scale from 0 (worst) to 100 (best health)).

PGI-I: patient global impression of improvement (only post-operative). \*PGI-I success: very much better and much better compared to situation before operation.

\*P-value represents the comparison between before surgery versus 2 years after surgery for both techniques (paired-samples t-test).

---

481

482

|                                      | Before surgery |                  |            |                  | 6 months    |                  |              |                  |
|--------------------------------------|----------------|------------------|------------|------------------|-------------|------------------|--------------|------------------|
|                                      | SSH (n=xxx)    |                  | MM (n =)   |                  | SSH (n=xxx) |                  | MM (n = xxx) |                  |
| <b>PFDI-20</b> (mean, SD/median IQR) | <b>NNN</b>     | <b>Mean ± SD</b> | <b>NNN</b> | <b>Mean ± SD</b> | <b>NNN</b>  | <b>Mean ± SD</b> | <b>NNN</b>   | <b>Mean ± SD</b> |
| UDI-6                                | NNN            | Mean ± SD        | NNN        | Mean ± SD        | NNN         | Mean ± SD        | NNN          | Mean ± SD        |
| CRADI-8                              | etc            | Mean ± SD        | NNN        | Mean ± SD        | NNN         | Mean ± SD        | NNN          | Mean ± SD        |
| POPDI-6                              |                | Mean ± SD        | NNN        | Mean ± SD        | NNN         | Mean ± SD        | NNN          | Mean ± SD        |
| <b>PFIQ-7§</b> ( )                   | <b>NNN</b>     | <b>Mean ± SD</b> | <b>NNN</b> | <b>Mean ± SD</b> | <b>NNN</b>  | <b>Mean ± SD</b> | <b>NNN</b>   | <b>Mean ± SD</b> |
| UIQ-7                                | NNN            | Mean ± SD        | NNN        | Mean ± SD        | NNN         | Mean ± SD        | NNN          | Mean ± SD        |
| CRAIQ-7                              | etc            | Mean ± SD        | NNN        | Mean ± SD        | etc         | Mean ± SD        | NNN          | Mean ± SD        |
| POPIQ-7                              |                | Mean ± SD        | NNN        | Mean ± SD        |             | Mean ± SD        | NNN          | Mean ± SD        |
| No complaints, n (%)                 |                |                  |            |                  |             |                  |              |                  |
| <b>PISQ-IR</b> (median, IQR)         | <b>NNN</b>     | <b>Mean ± SD</b> | <b>NNN</b> | <b>Mean ± SD</b> | <b>NNN</b>  | <b>Mean ± SD</b> | <b>NNN</b>   | <b>Mean ± SD</b> |
| Sexually active                      | NNN            | Mean ± SD        | NNN        | Mean ± SD        | NNN         | Mean ± SD        | NNN          | Mean ± SD        |
| Sexually inactive                    |                | Mean ± SD        | NNN        | Mean ± SD        |             | Mean ± SD        | NNN          | Mean ± SD        |
| <b>EQ-5D-5L</b> (median, IQR)        |                | Etc              |            |                  |             |                  |              |                  |
| Mobility                             |                |                  |            |                  |             |                  |              |                  |
| Self-care                            |                |                  |            |                  |             |                  |              |                  |
| Usual activities                     |                |                  |            |                  |             |                  |              |                  |
| Pain                                 |                |                  |            |                  |             |                  |              |                  |
| Anxiety                              |                |                  |            |                  |             |                  |              |                  |
| EQ-VAS                               |                |                  |            |                  |             |                  |              |                  |
| <b>PGI-I</b>                         |                |                  |            |                  |             |                  |              |                  |
| Very much better                     |                | -                |            | -                |             | N (%)            |              | N (%)            |
| Much better                          |                | -                |            | -                |             |                  |              |                  |
| Minimally better                     |                | -                |            | -                |             |                  |              |                  |
| No change                            |                | -                |            | -                |             |                  |              |                  |
| Minimally worse                      |                | -                |            | -                |             |                  |              |                  |
| Much worse                           |                | -                |            | -                |             |                  |              |                  |
| Very much worse                      |                | -                |            | -                |             |                  |              |                  |

PFDI-20: Pelvic Floor Disability Index-20, higher scores indicate more symptom distress.  
PFIQ-7: Pelvic Floor Impact Questionnaire-7, higher scores indicate more impact on daily activity.  
PISQ-IR: Pelvic Organ Prolapse/Urinary Incontinence Sexual Questionnaire, IUGA-Revised, scores are total scores, not subdomains (score ranges from 1 (worse sexual experience) to 5 (better sexual experience)).  
EQ5D-5L: EuroQol 5 dimensions-5 levels, index-scores calculated with EQ-5D value set for the Netherlands. EQ-VAS: EuroQol vertical visual analogue scale, patient's self-rated health (scale from 0-100 (worst to best health)).  
PGI-I: patient global impression of improvement (only post-operative). \*PGI-I success: very much better and much better compared to situation before operation.

484

485 **13.5 Secondary outcome (surgery related morbidity/complications)**486 **Table 4 Surgical procedures and perioperative outcomes Data are presented as numbers (percentages)**  
487 **unless stated otherwise**

| Characteristics                                     | Sacrospinous hysteropexy (n=...) | Modified Manchester (n=...) | Risk difference (95% CI) |
|-----------------------------------------------------|----------------------------------|-----------------------------|--------------------------|
| Operating time (min), median (IQR, 95%CI)           | Median (IQR, 95% CI)             | Median (IQR, 95% CI)        |                          |
| Estimated blood loss (mL), median (IQR, 95%CI)      | Median (IQR, 95% CI)             | Median (IQR, 95% CI)        |                          |
| Length of hospital stay (days), median (IQR, 95%CI) | Median (IQR, 95% CI)             | Median (IQR, 95% CI)        |                          |
| Concomitant surgery                                 | NNN (%)                          | NNN (%)                     | difference (95% CI)      |
| Anterior colporrhaphy                               | NNN (%)                          | NNN (%)                     | difference (95% CI)      |
| Posterior colporrhaphy                              | NNN (%)                          | NNN (%)                     | difference (95% CI)      |
| Anterior and posterior colporrhaphy                 | NNN (%)                          | NNN (%)                     | difference (95% CI)      |
| Other                                               | NNN (%)                          | NNN (%)                     | difference (95% CI)      |
| Surgeon                                             |                                  |                             |                          |
| Gynaecologist                                       | NNN (%)                          | NNN (%)                     | difference (95% CI)      |
| Resident                                            | NNN (%)                          | NNN (%)                     | difference (95% CI)      |
| Type of SSH procedure                               |                                  | NA                          |                          |
| Open                                                | NNN (%)                          | NA                          |                          |
| Device                                              | NNN (%)                          | NA                          |                          |
| Histology of cervix after MM                        |                                  |                             |                          |
| CIN 1                                               | NA                               | N (%)                       |                          |
| CIN 2                                               | NA                               | N (%)                       |                          |
| CIN 3                                               | NA                               | N (%)                       |                          |

488 Percentages were calculated using non-missing data. SD=standard deviation; CI=confidence interval; SSH=sacrospinous  
489 hysteropexy; MM=modified Manchester. Other: xxxxxx NA= not applicable.

490



491  
492

**Table 6. Adverse Events Related to the Surgical Outcome**

|                                                              | Sacrospinous<br>hysteropexy n= | Modified<br>Manchester n= | Sig. (p) |
|--------------------------------------------------------------|--------------------------------|---------------------------|----------|
| <b>Women with Serious Adverse Event (SAE), n (%)</b>         | N (%)                          | N (%)                     |          |
| Death                                                        |                                |                           |          |
| likely to be related to surgery*                             | N (%)                          | N (%)                     |          |
| not related to surgery**                                     | N (%)                          | N (%)                     |          |
| <b>Intraoperative period</b>                                 |                                |                           |          |
| Injury to adjacent organs                                    | N (%)                          | N (%)                     |          |
| Blood loss >500 mL                                           |                                |                           |          |
| Blood transfusion                                            |                                |                           |          |
| Anesthetic incident‡                                         |                                |                           |          |
| <b>Postoperative period</b>                                  |                                |                           |          |
| Infection:                                                   |                                |                           |          |
| temperature >38 measured twice in 12h                        | N (%)                          | N (%)                     |          |
| urinary tract infection (<6w postop)                         |                                |                           |          |
| wound infection                                              |                                |                           |          |
| other infections†                                            |                                |                           |          |
| Urinary retention* with following treatment:                 |                                |                           |          |
| Foley catheter                                               |                                |                           |          |
| clean intermittent self-catheterization (CIC)                |                                |                           |          |
| Foley catheter and CIC                                       |                                |                           |          |
| number of days (median, IQR)                                 |                                |                           |          |
| Opiate use > 2 days after surgery                            |                                |                           |          |
| Bleeding:                                                    |                                |                           |          |
| delayed hemorrhage                                           |                                |                           |          |
| hematoma                                                     |                                |                           |          |
| Reoperation other than POP <sup>‡</sup> ; for reason:        |                                |                           |          |
| hemorrhage needing surgery                                   |                                |                           |          |
| suture removal                                               |                                |                           |          |
| Re-hospitalization other than POP <sup>‡</sup> ; for reason: |                                |                           |          |
| suture removal <sup>§</sup>                                  |                                |                           |          |
| urinary retention                                            |                                |                           |          |
| infection                                                    |                                |                           |          |
| delayed hematoma (needing surgery)                           |                                |                           |          |
| constipation                                                 |                                |                           |          |
| Buttock pain and extra visit(s)                              |                                |                           |          |
| Buttock pain; with treatment(s):                             |                                |                           |          |
| suture removal                                               |                                |                           |          |

|                         | Sacrospinous<br>hysteropexy n= | Modified<br>Manchester n= | Sig. (p) |
|-------------------------|--------------------------------|---------------------------|----------|
| nerve block             |                                |                           |          |
| physical therapy        |                                |                           |          |
| Malignancy              |                                |                           |          |
| Cervical stenosis       |                                |                           |          |
| of whom had hematometra |                                |                           |          |

493  
494  
495  
496  
497  
498  
499  
500

Data are presented as numbers (percentages) unless stated otherwise; POP= pelvic organ prolapse; N/A= not applicable; CI= Confidence Interval. \*= cause of death: pulmonary embolism 5 weeks post-operative, which is possibly related to the surgery; \*\*= cause of death: .. ; ‡= reoperation and rehospitalization for recurrence of POP are not included in table 6, but are shown in table 2; \*= repetitive >150mL residual urine (according to local protocol) or prolonged catheterization (more than 24h after first removal of CAD; †=other infection consists of:... ; Sig (p) = p value as calculated with tests for significance as appropriate: a= Fischer exact test, b= Chi square test, c= Mann Whitney U.

501

502 *Appendix table 1 Subgroup analysis*

| Variable                                                              | Sacrospinous<br>hysteropexy<br>n= | Modified<br>Manchester<br>n= | Odds Ratio (95% CI) | P-value<br>interaction |
|-----------------------------------------------------------------------|-----------------------------------|------------------------------|---------------------|------------------------|
| <i>Age, years‡</i>                                                    |                                   |                              |                     |                        |
| <i>Menopausal status</i>                                              |                                   |                              |                     |                        |
| No                                                                    | nn/NN (%)                         | nn/NN (%)                    | OR (xx to xx)       | 0.xx                   |
| Yes                                                                   |                                   |                              |                     |                        |
| <i>Local oestrogen use<br/>preoperative</i>                           |                                   |                              |                     |                        |
| No                                                                    |                                   |                              |                     |                        |
| Yes                                                                   |                                   |                              |                     |                        |
| <i>Sexual activity</i>                                                |                                   |                              |                     |                        |
| No                                                                    |                                   |                              |                     |                        |
| Yes                                                                   |                                   |                              |                     |                        |
| <i>POP-Q stage preoperative<br/>(stage 2 versus stage 3 or 4)</i>     |                                   |                              |                     |                        |
| Stage 2                                                               |                                   |                              |                     |                        |
| Stage 3 or 4                                                          |                                   |                              |                     |                        |
| <i>Cervical elongation, cm †‡</i>                                     |                                   |                              |                     |                        |
| <i>Concomitant vaginal repair<br/>(anterior or posterior or both)</i> |                                   |                              |                     |                        |
| No                                                                    |                                   |                              |                     |                        |
| Yes                                                                   |                                   |                              |                     |                        |
| <i>Anterior vaginal repair</i>                                        |                                   |                              |                     |                        |
| No                                                                    |                                   |                              |                     |                        |
| Yes                                                                   |                                   |                              |                     |                        |
| <i>Posterior vaginal repair</i>                                       |                                   |                              |                     |                        |
| No                                                                    |                                   |                              |                     |                        |
| Yes                                                                   |                                   |                              |                     |                        |

Data present the number of women (%) in whom the treatment was a success as by the composite outcome of success; The composite outcome success defined as the absence of POP beyond the hymen in any compartment, and the absence of bulge symptoms and the absence of reoperation or pessary treatment for POP; Subgroup analyses were performed for the composite outcome of success by addition of the variables as interaction term; Odds ratio as assessed with logistic regression analysis; ‡ mean (SD); † Cervical elongation as measured by preoperative POP-Q point D minus preoperative POP-Q point C; p-value interaction represents the effect of the interaction term on the composite outcome of success.

503

| Characteristics                                 | Complete follow-up (n=) |              | Incomplete follow-up (n=) |              |
|-------------------------------------------------|-------------------------|--------------|---------------------------|--------------|
|                                                 | SSH                     | MM           | SSH                       | MM           |
| No of patients                                  | nn (%)                  | nn (%)       | nn (%)                    | nn (%)       |
| Age in years, median (IQR)                      | Median (IQR)            | Median (IQR) | Median (IQR)              | Median (IQR) |
| Highest educational level:                      |                         |              |                           |              |
| Primary or secondary school                     |                         |              |                           |              |
| High school                                     |                         |              |                           |              |
| Bachelor, master or academic degree             |                         |              |                           |              |
| Comorbidity:                                    |                         |              |                           |              |
| Cardiovascular disease                          |                         |              |                           |              |
| Diabetes mellitus                               |                         |              |                           |              |
| Respiratory disease                             |                         |              |                           |              |
| Smoker                                          |                         |              |                           |              |
| Postmenopausal                                  |                         |              |                           |              |
| No of vaginal deliveries, median (IQR)          | Median (IQR)            | Median (IQR) | Median (IQR)              | Median (IQR) |
| No of caesarean deliveries median (IQR)         |                         |              |                           |              |
| No of assisted vaginal deliveries, median (IQR) |                         |              |                           |              |
| Positive family history for prolapse            |                         |              |                           |              |
| Body mass index, mean (SD)                      |                         |              |                           |              |
| POP-Q stage cervix (point C) pre-operative      |                         |              |                           |              |
| 2                                               |                         |              |                           |              |
| 3                                               |                         |              |                           |              |
| 4                                               |                         |              |                           |              |
| Prolapse beyond hymen pre-operative             |                         |              |                           |              |
| Anterior (POP-Q Aa or Ba > 0)                   |                         |              |                           |              |
| Apical (POP-Q C > 0)                            |                         |              |                           |              |
| Posterior (POP-Q Ap or Bp > 0)                  |                         |              |                           |              |
| Overall POP-Q stage pre-operative               |                         |              |                           |              |
| 2                                               |                         |              |                           |              |
| 3                                               |                         |              |                           |              |
| 4                                               |                         |              |                           |              |

Data presented as numbers (percentages) unless stated otherwise; SD= standard deviation; IQR= interquartile range; POP-Q= pelvic organ prolapse quantification; POP= Pelvic organ prolapse; No= number; Stage POP-Q stage 2: most distal prolapse is between 1 cm above and 1 cm beyond hymen; stage 3: most distal prolapse is prolapsed >1 cm beyond hymen but no further than 2 cm less than total vaginal length; stage 4: total prolapse. Degree of prolapse of anterior vaginal wall (Aa and Ba), posterior vaginal wall (Ap and Bp), and uterus or vaginal vault (C) measured in centimeters both above or proximal to hymen (negative number) or beyond or distal to hymen (positive number), with plane of hymen defined as zero. A represents the descent of a measurement point 3 cm proximal to the hymen on the anterior (Aa) and posterior (Ap) vaginal wall. B is the most descended edge on the anterior (Ba) and posterior (Bp) vaginal wall.

506 **14. Figures**

507 **14.1 Flowchart of participants**

508 A CONSORT flowchart including the type of choices should be included.

509 *Illustrative example*

510 The flow of study participants will be presented using the CONSORT flow-chart for clinical trial participants as  
511 shown below.

512

513

514

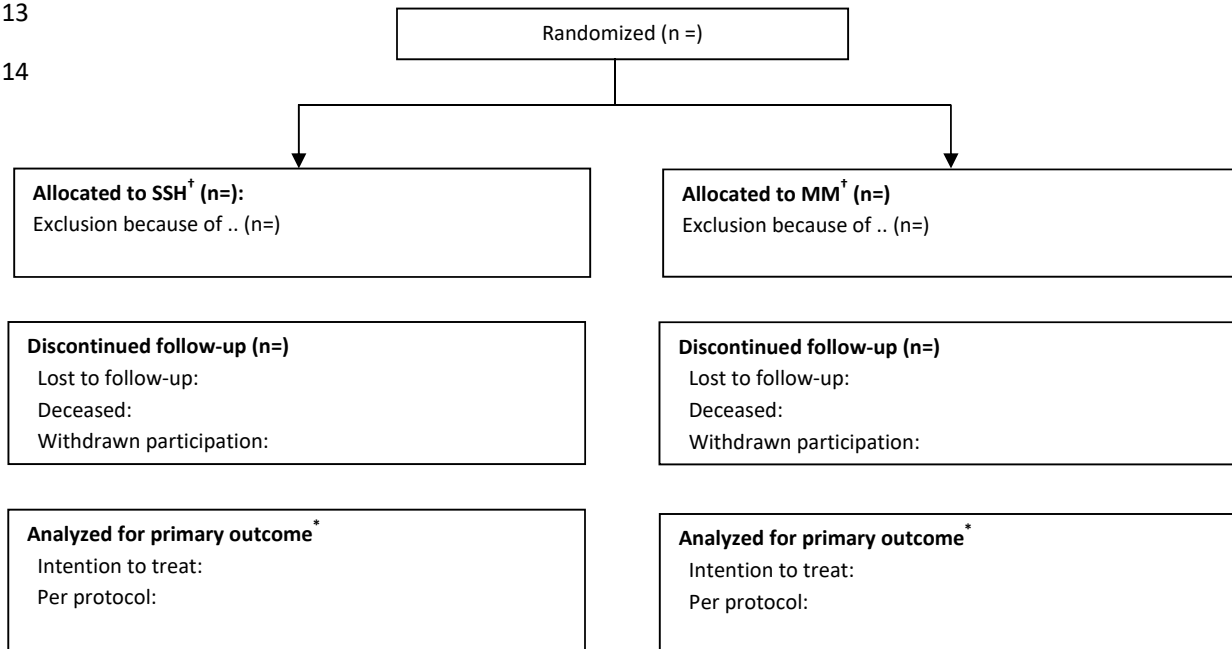

515

516

517 † SSH: sacrospinous hysteropexy, MM: modified Manchester, POP-Q: pelvic organ prolapse quantification.

518 \* primary outcome: composite outcome of success.

519

520

521

522

## 15. References

523

524 1. Visser L, de Boer MA, de Groot CJM, Nijman TAJ, Hemels MAC, Bloemenkamp KWM, et al.

525 Low dose aspirin in the prevention of recurrent spontaneous preterm labour - the APRIL study: a  
526 multicenter randomized placebo controlled trial. *BMC Pregnancy Childbirth*. 2017;17(1):223.

527 2. van IJsselmuiden MN, van Oudheusden A, Veen J, van de Pol G, Vollebregt A, Radder CM, et  
528 al. Hysteropexy in the treatment of uterine prolapse stage 2 or higher: laparoscopic

529 sacrohysteropexy versus sacrospinous hysteropexy-a multicentre randomised controlled trial (LAVA  
530 trial). *BJOG : an international journal of obstetrics and gynaecology*. 2020;127(10):1284-93.

531 3. Detollenaere RJ, den Boon J, Stekelenburg J, IntHout J, Vierhout ME, Kluivers KB, et al.

532 Sacrospinous hysteropexy versus vaginal hysterectomy with suspension of the uterosacral ligaments  
533 in women with uterine prolapse stage 2 or higher: multicentre randomised non-inferiority trial. *BMJ*

534 (Clinical research ed). 2015;351:h3717.

535
