# Supplementary material
Source: PubMed Central journal article supplement (PMC10427949)
Supplement: jama-e2313140-s004.pdf [file jama-e2313140-s004.pdf]

Enklaar RA, Schulten SM, van Eijndhoven HF, et al. Manchester procedure vs sacrospinous hysteropexy for treatment of uterine descent. *JAMA*. Published August 15, 2023. doi:10.1001/jama.2023.13140

## Data Sharing Statement

### Data

**Data available:** Yes

**Data types:** Deidentified participant data

**How to access data:** [kirsten.kluiwers@radboudumc.nl](mailto:kirsten.kluiwers@radboudumc.nl)

**When available:** With publication

### Supporting Documents

**Document types:** None

### Additional Information

**Who can access the data:** The data will be available to the researchers who have a reasonable request and whose proposed use of the data has been approved.

**Types of analyses:** Any request will be evaluated in the research group and then will be decided whether the data can be used for the requested analyses.

**Mechanisms of data availability:** With a signed data access agreement.
